# Supplementary material for: Ultra-high adsorption of tetracycline antibiotics on garlic skin-derived porous biomass carbon with high surface area
Source: Royal Society of Chemistry journal article supplement (doi:10.1039/c9nj05396d), 2019-12-13
Supplement: c9nj05396d1.pdf [file c9nj05396d1.pdf]

## New Journal of Chemistry

### Supplementary material

#### **Ultra-high adsorption of tetracycline antibiotics on garlic skin-derived porous biomass carbon with high surface area.**

Shujian Liu<sup>a</sup>, Mingdi Pan<sup>b</sup>, Zhongmin Feng<sup>a</sup>, Yangchun Qin<sup>a</sup>, Yun Wang<sup>a\*</sup>, Lili Tan<sup>c</sup>,  
Ting Sun<sup>a\*</sup>

*<sup>a</sup>College of Sciences, Northeastern University, 3-11, Wenhua Road, Shenyang, Liaoning, 110819, China.*

*<sup>b</sup>Chaoyang Inspection, Examination & Certification Centre, Street, Chaoyang 122000*

*<sup>c</sup>Shaanxi Joint Laboratory of Graphene Northwestern Polytechnical University, Xi'an 710072, P. R. China*

\* Corresponding Authors: [wyun1989@126.com](mailto:wyun1989@126.com) (Yun Wang); [sun1th@163.com](mailto:sun1th@163.com)  
(Ting Sun)

## List of figures

**Fig. S1.** Schematic illustration of the GSP-BC preparation.

**Fig. S2.** (a) XRD image of GSP-BC before acid washing. (b) Adsorption capacity and removal rate of GSP-BC to TCH at different TCH initial concentrations. (c) FT-IR spectra of GSP-BC before and after adsorption of TCH. (d) Equilibrium adsorption capacity of GSP-BC to TCH at different temperatures. (e) Recyclability test of the GSP-BC for TCH removal. (f) Adsorption capacity of doxycycline (DC), oxytetracycline (OTC), chlortetracycline (CTC) on the GSP-BC.

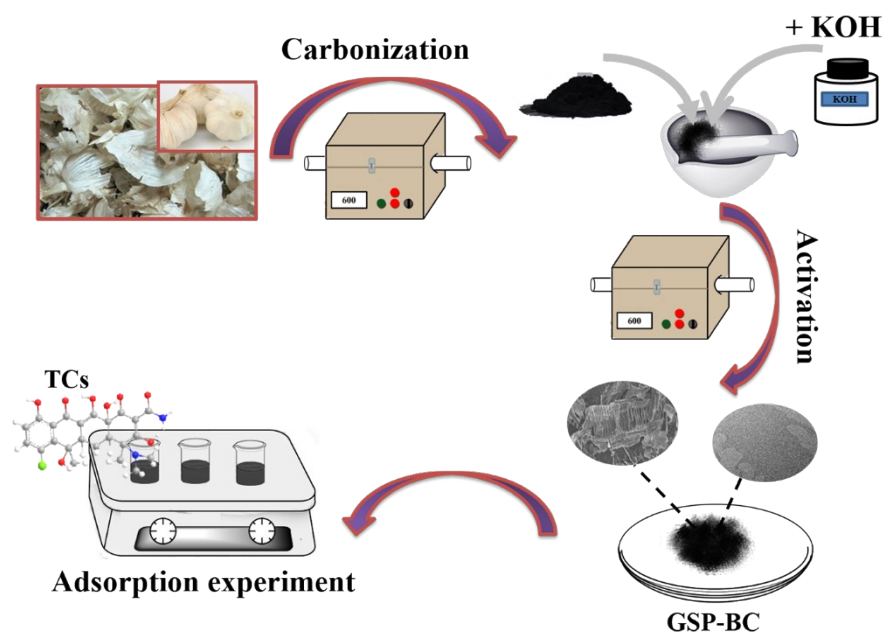

**Fig. S1.** Schematic illustration of the GSP-BC preparation

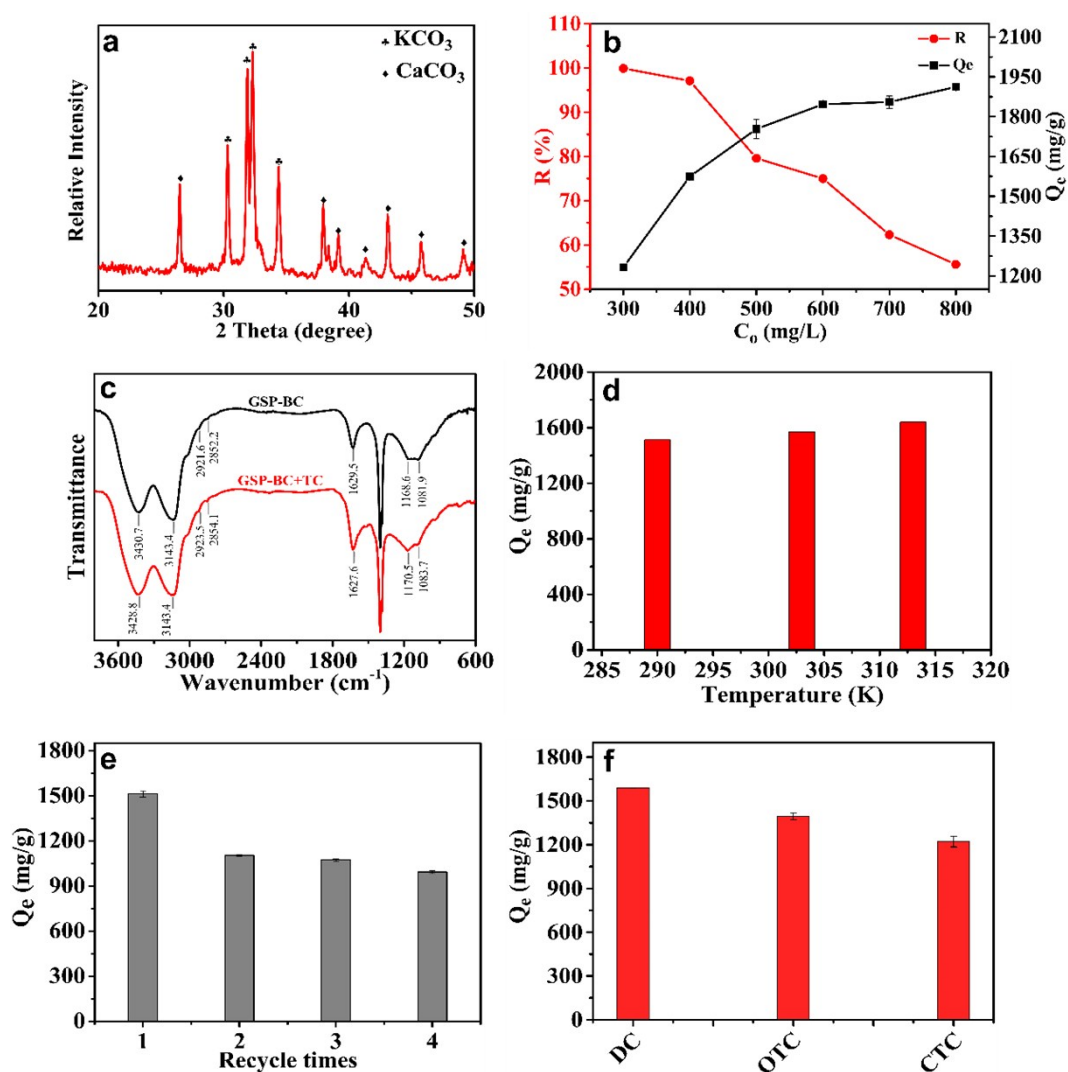

**Fig. S2.** (a) XRD image of GSP-BC before acid washing. (b) Adsorption capacity and removal ratio of GSP-BC to TCH at different TCH initial concentrations. (c) FT-IR spectra of GSP-BC before and after adsorption of TCH. (d) Equilibrium adsorption capacity of GSP-BC to TCH at different temperatures. (e) Recyclability test of the GSP-BC for TCH removal. (f) Adsorption capacity of doxycycline (DC), oxytetracycline (OTC), chlortetracycline (CTC) on the GSP-BC.

**Table S1** The content of carbon, oxygen and oxygen-containing functional groups in Raw-BC and GSP-BC.

| Samples | C<br>(%) | O<br>(%) | C1s (%)            |                   |                   |                   | O1s (%)           |                     |                    |
|---------|----------|----------|--------------------|-------------------|-------------------|-------------------|-------------------|---------------------|--------------------|
|         |          |          | COOH<br>289.0 (eV) | C-O<br>286.8 (eV) | C-C<br>285.7 (eV) | C=C<br>(284.6 eV) | C=O<br>(532.1 eV) | C-O-C<br>(532.8 eV) | COOH<br>(533.7 eV) |
| Raw-BC  | 92.13    | 6.58     | 5.94               | 8.96              | 74.83             | 10.27             | 49.12             | 28.67               | 22.21              |
| GSP-BC  | 89.83    | 9.83     | 8.39               | 9.53              | 73.03             | 9.03              | 33.89             | 31.08               | 35.02              |
